# Supplementary material for: Trimetallic NiFePd nanoalloy catalysed hydrogen generation from alkaline hydrous hydrazine and sodium borohydride at room temperature
Source: Royal Society of Chemistry journal article supplement (doi:10.1039/c5ta05814g), 2015-01-01
Supplement: c5ta05814g1.pdf [file c5ta05814g1.pdf]

**Electronic Supplementary Information**

**Trimetallic NiFePd nanoalloy catalysed hydrogen generation from alkaline hydrous hydrazine and sodium borohydride at room temperature**

Debaleena Bhattacharjee and Subrata Dasgupta \*

Ceramic Membrane Division, CSIR-Central Glass & Ceramic Research Institute,

196, Raja S C Mullick Road, Kolkata 700 032, India.

Email: [sdasgupta@cgcri.res.in](mailto:sdasgupta@cgcri.res.in) (SD); Fax: +913324730957; Tel: +913323223454

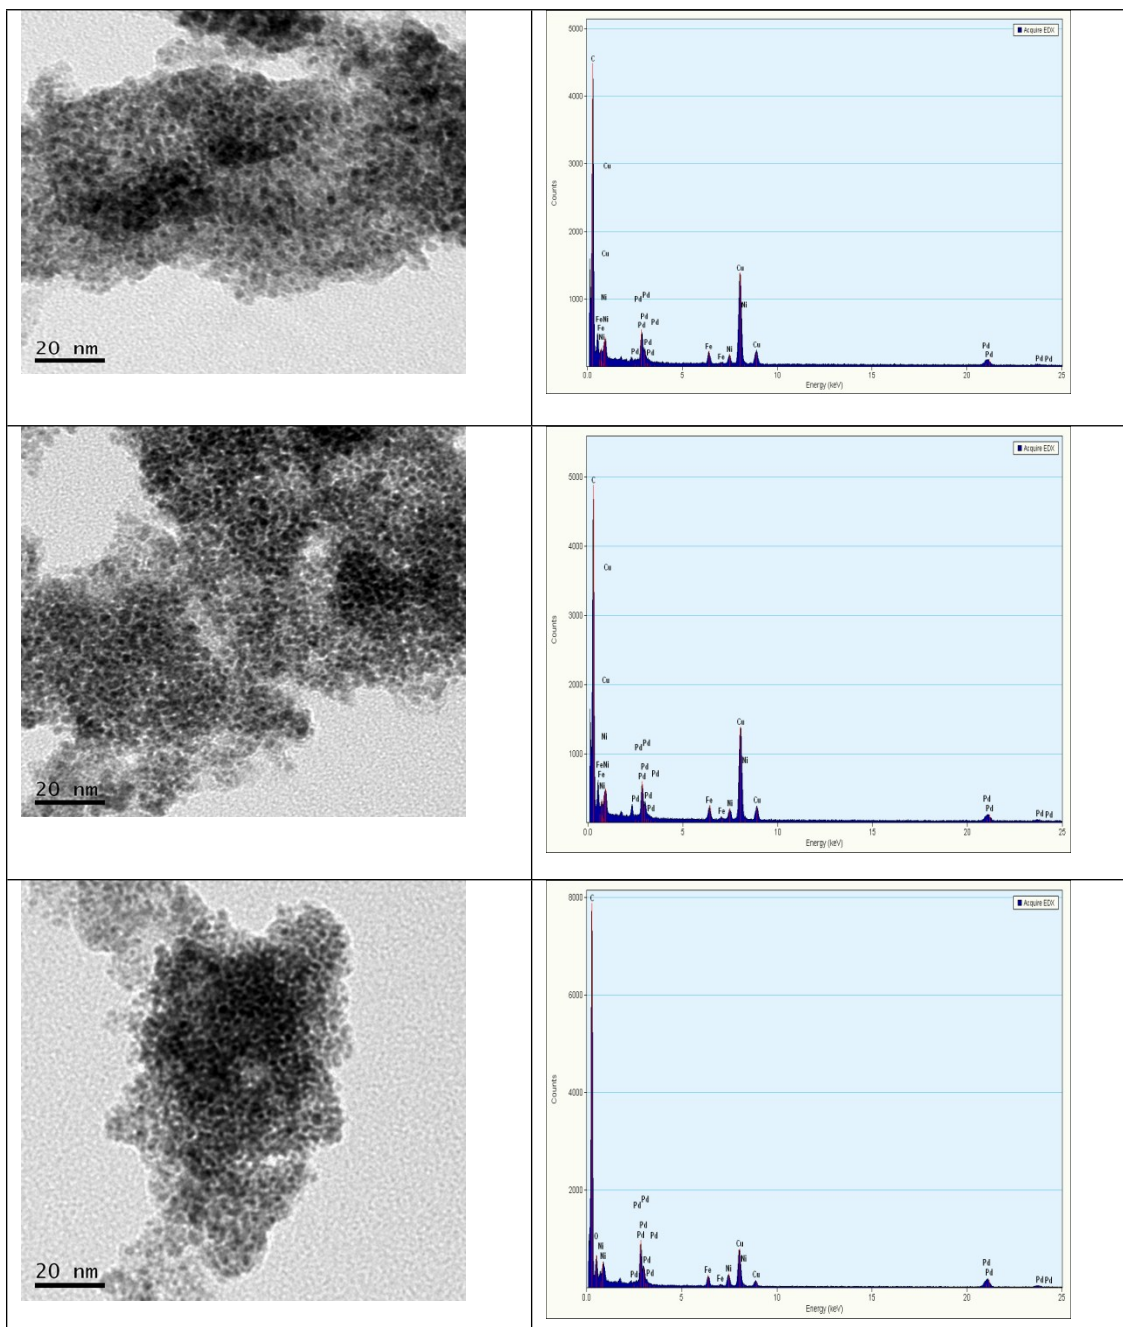

**Fig. S1 EDX analysis of  $\text{Ni}_{30}\text{Fe}_{30}\text{Pd}_{40}$  NPs shows uniform composition throughout the sample.**

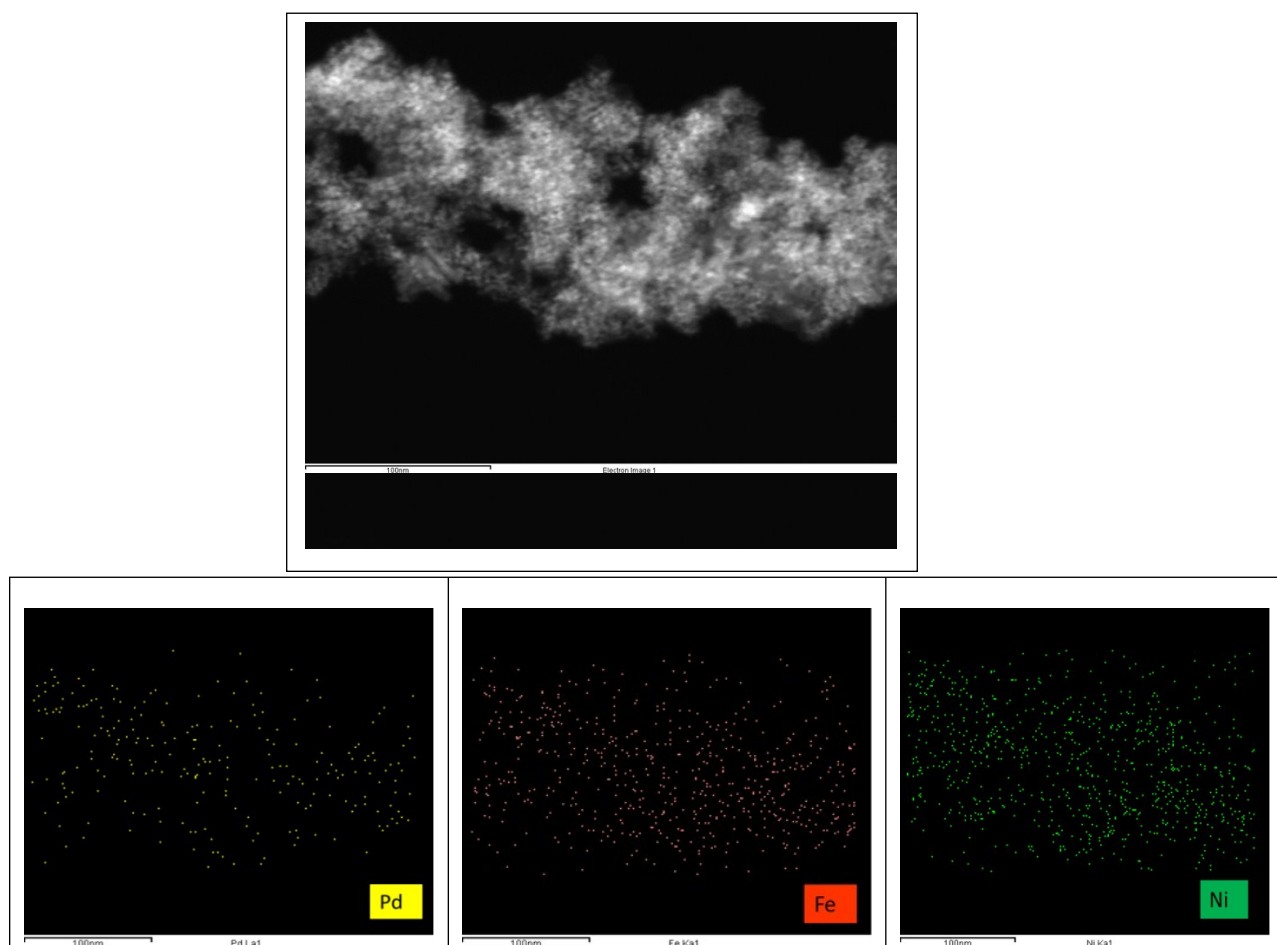

**Fig. S2** HAADF-STEM image of  $\text{Ni}_{30}\text{Fe}_{30}\text{Pd}_{40}$  NPs; corresponding map-scan profiles of Pd, Fe and Ni are shown. These confirm the uniform composition of the NPs.

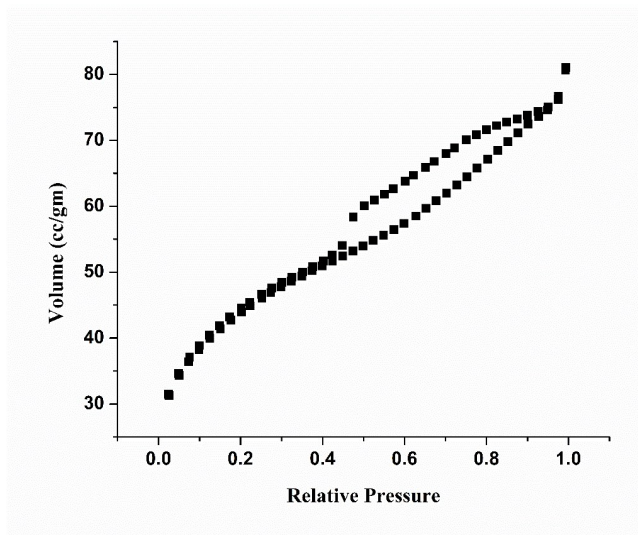

Fig. S3 N<sub>2</sub> adsorption/desorption isotherms of the trimetallic Ni<sub>30</sub>Fe<sub>30</sub>Pd<sub>40</sub> NPs having surface area of 156 m<sup>2</sup>g<sup>-1</sup>.

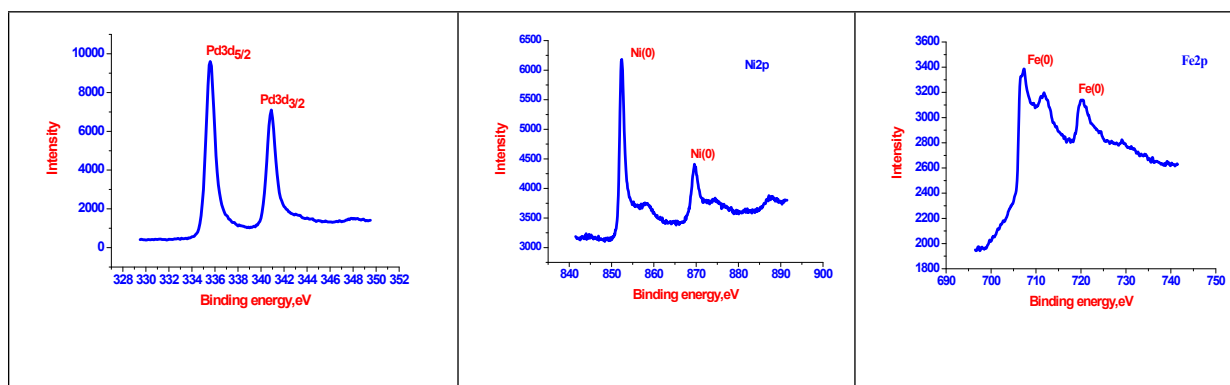

Fig. S4 XPS spectra of Ni<sub>30</sub>Fe<sub>30</sub>Pd<sub>40</sub> NPs after 10mins of Ar sputtering

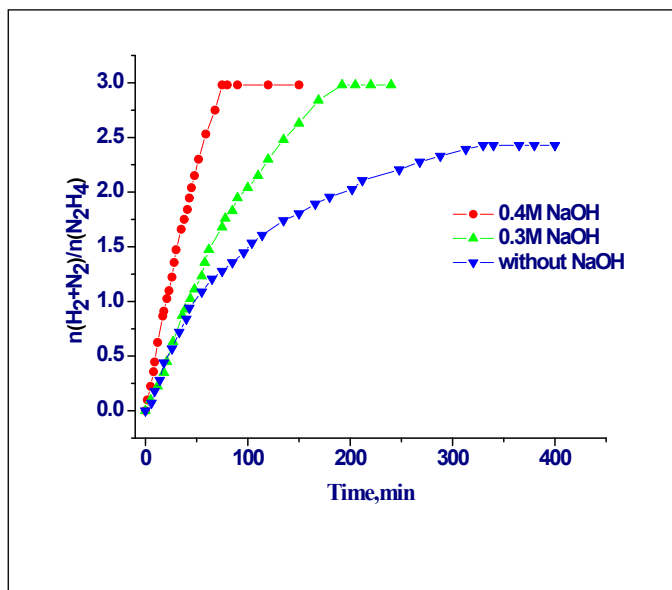

Fig. S5 NaOH variation in the decomposition of 10 mL of 0.5 M hydrous hydrazine (hydrazine: catalyst =10:1) using  $\text{Ni}_{30}\text{Fe}_{30}\text{Pd}_{40}$  NPs at 298K.

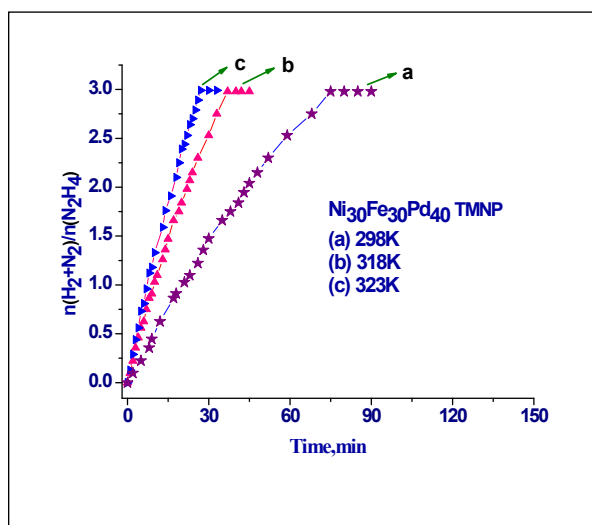

Fig. S6 Time profile for decomposition of 10 ml of 0.5M hydrous hydrazine (hydrazine: catalyst =10:1) using  $\text{Ni}_{30}\text{Fe}_{30}\text{Pd}_{40}$  NPs at different temperatures.

### Activation Energy graph

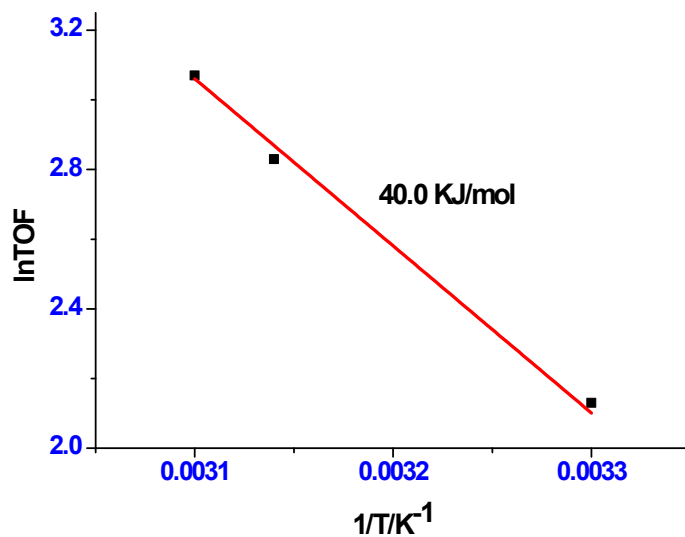

Fig. S7 Arrhenius plot for decomposition of hydrazine catalyzed by Ni<sub>30</sub>Fe<sub>30</sub>Pd<sub>40</sub> NPs.

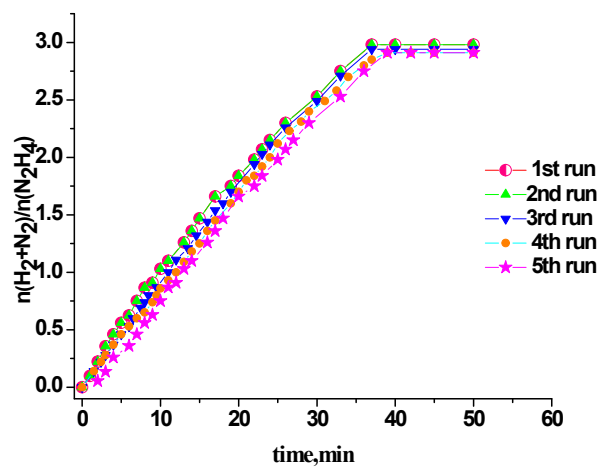

Fig S8 Recycle test of Ni<sub>30</sub>Fe<sub>30</sub>Pd<sub>40</sub> NPs for the decomposition of 10 ml of 0.5M hydrous hydrazine (hydrazine: catalyst =10:1) in 0.4 M NaOH media at 318K. The results show no significant decrease in catalytic activity of Ni<sub>30</sub>Fe<sub>30</sub>Pd<sub>40</sub> TMNPs over 5 cycles.

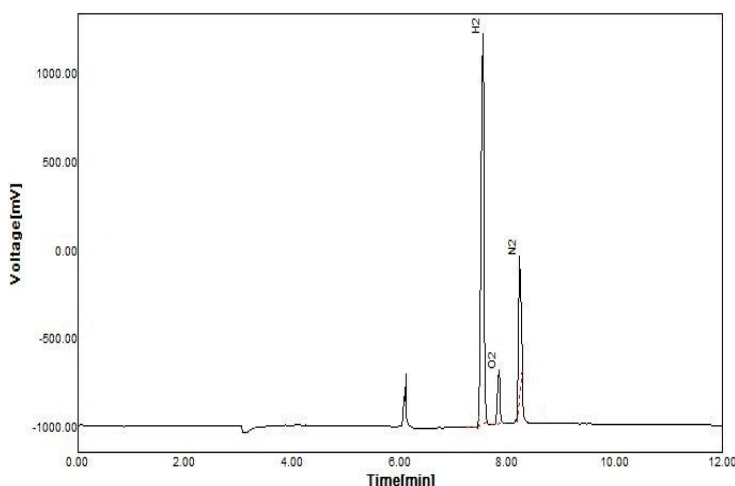

**Fig. S9 GC-TCD spectrum of the evolved gas released from complete decomposition of hydrous hydrazine over Ni<sub>30</sub>Fe<sub>30</sub>Pd<sub>40</sub> NPs (hydrazine: catalyst =10:1) in alkaline media at 298K. Small amount of O<sub>2</sub> comes from the air at the time of gas collection.**

### TOF calculation method

The TOF<sub>initial</sub> is calculated from the formula<sup>1</sup>

$$\text{TOF}_{\text{initial}} = \frac{P_{\text{atm}} V_{\text{H}_2+\text{N}_2} / RT}{3n_{\text{metal}} t}$$

Where TOF<sub>initial</sub> is the initial turnover frequency,  $P_{\text{atm}}$  is the atmospheric pressure,  $V_{\text{H}_2+\text{N}_2}$  is the volume of the generated gas (H<sub>2</sub>+N<sub>2</sub>) when the conversion reaches 50%, R is the universal gas constant,  $T$  is the room temperature (298 K),  $n_{\text{metal}}$  is the mole number of metal catalyst, and  $t$  is the reaction time when the conversion reaches 50%.

The relationship of the temperature and the initial rate (conversion <50%)<sup>2</sup> followed Arrhenius behaviour. The Arrhenius' reaction rate equation<sup>2</sup> can be written as follows:

$$\ln \text{TOF} = \ln A - E_a / RT$$

Where A is the reaction constant

References:

1. L. Yu, X. S. Zhang and L. Y. Yu, *Adv. Mater. Res.* 2012, 396-398,130.
2. A. Boddien, D. Mellmann, F. Gärtner, R. Jackstell, H. Junge, P. J. Dyson, G. Laurenczy, R. Ludwig and M. Beller, *Science*, 2011, 333, 1733.

Table S1: Activities in-terms of TOF values of different nanocatalysts tested for hydrogen generation from the decomposition of  $N_2H_4.H_2O$  solution

| Catalyst                                             | Temp (K)   | Reaction time(h) | Selectivity for $H_2$ (%) | TOF <sub>initial</sub>     | References       |
|------------------------------------------------------|------------|------------------|---------------------------|----------------------------|------------------|
| Ni/Al <sub>2</sub> O <sub>3</sub>                    | 303        | 1.167            | 93                        | 2.2 h <sup>-1</sup>        | [43]             |
| Ni <sub>0.60</sub> Pd <sub>0.40</sub>                | 323        | 3.167            | 82                        | 3.8 h <sup>-1</sup>        | [30]             |
| Ni <sub>0.60</sub> Pd <sub>0.40</sub>                | 298        | 1.0              | 100                       | 9.15 h <sup>-1</sup>       | [9]              |
| NiFe(1:1)                                            | 343        | 3.167            | 100                       | 4.2 h <sup>-1</sup>        | [40]             |
| Ni <sub>0.6</sub> Fe <sub>0.4</sub> Mo               | 323        | 0.250            | 100                       | 28.8 h <sup>-1</sup>       | [14]             |
| Ni-CeO <sub>2</sub>                                  | 323        | 0.25             | 100                       | 51.6 h <sup>-1</sup>       | [44]             |
| Ni <sub>0.93</sub> Pt <sub>0.07</sub>                | 298        | 3.167            | 100                       | 2.8 h <sup>-1</sup>        | [29]             |
| Ni <sub>0.95</sub> Ir <sub>0.05</sub>                | 298        | 6.5              | 100                       | 2.2 h <sup>-1</sup>        | [28]             |
| RhNi@graphene                                        | 298        | 0.817            | 100                       | 13.7 h <sup>-1</sup>       | [33]             |
| <b>Ni<sub>30</sub>Fe<sub>30</sub>Pd<sub>40</sub></b> | <b>323</b> | <b>0.61</b>      | <b>100</b>                | <b>21.5 h<sup>-1</sup></b> | <b>This work</b> |



Table S2: Activities in terms of rate of gas generation of different nanocatalysts tested for hydrogen generation from the hydrolysis of alkaline sodium borohydride

| Catalyst                                           | Temp (°C) | NaBH <sub>4</sub>                            | NaOH (wt%) | Catalyst Activity (mL H <sub>2</sub> min <sup>-1</sup> g catalyst <sup>-1</sup> ) | References       |
|----------------------------------------------------|-----------|----------------------------------------------|------------|-----------------------------------------------------------------------------------|------------------|
| 5 wt.% Ru on IRA-400                               | 32.5      | 7.5 wt.%                                     | 1          | 606                                                                               | [66]             |
| Ni <sub>2</sub> B                                  | 20        | 0.2 g in 20ml of NaBH <sub>4</sub>           | 10         | 18.3                                                                              | [67]             |
| Co <sub>2</sub> B                                  | 20        | 0.2 g in 20ml of NaBH <sub>4</sub> solution  | 10         | 468                                                                               | [68]             |
| Ni-Co-B                                            | 28        | 0.16 g of 5 ml of NaBH <sub>4</sub> solution | 15         | 2608                                                                              | [69]             |
| Pt/LiCoO <sub>2</sub>                              | 22        | 20 wt.%                                      | 10         | 3100                                                                              | [70]             |
| Pt-Ru/LiCoO <sub>2</sub>                           | 25        | 5 wt.%                                       | 5          | 2400                                                                              | [71]             |
| Pt/LiCoO <sub>2</sub>                              | 20        | 10 wt.%                                      | 10         | 1250                                                                              | [72]             |
| Rh/TiO <sub>2</sub>                                | 23        | 15 wt.%                                      | 5          | 210                                                                               | [73]             |
| Co-B/Pd                                            | 30        | 20 wt.%                                      | 4          | 2875                                                                              | [74]             |
| Co-Ni-B                                            | 25        | 0.95 wt.%                                    | 1          | 1175                                                                              | [75]             |
| Co-Fe-B                                            | 25        | 0.95 wt.%                                    | 1          | 1300                                                                              | [75]             |
| Co-Cu-B                                            | 25        | 0.95 wt.%                                    | 1          | 2210                                                                              | [75]             |
| Co-Cr-B                                            | 25        | 0.95 wt.%                                    | 1          | 3400                                                                              | [75]             |
| Co-Mo-B                                            | 25        | 0.95 wt.%                                    | 1          | 2875                                                                              | [75]             |
| Pt/LiCoO <sub>2</sub>                              | 22        | 20 wt.%                                      | 10         | 3100                                                                              | [76]             |
| Ni <sub>40</sub> Fe <sub>40</sub> Pd <sub>20</sub> | 25        | 0.19 g in 10ml of NaBH <sub>4</sub> solution | 20         | 3343                                                                              | <b>This work</b> |

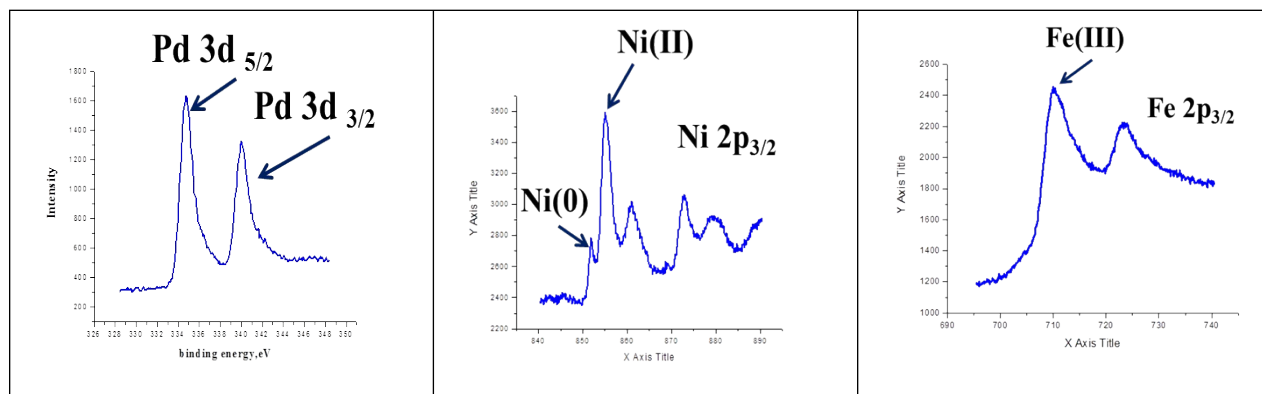

**Fig. S10** XPS spectra of Ni<sub>40</sub>Fe<sub>40</sub>Pd<sub>20</sub> NPs.
